# Supplementary material for: scTenifoldNet: A Machine Learning Workflow for Constructing and Comparing Transcriptome-wide Gene Regulatory Networks from Single-Cell Data
Source: PubMed Central journal article supplement — Patterns (N Y). 2020 Nov 5;1(9):100139. doi: 10.1016/j.patter.2020.100139 (PMC7733883; doi:10.1016/j.patter.2020.100139), 2020-11-05

**PATTER, Volume 1**

**Supplemental Information**

**scTenifoldNet: A Machine Learning Workflow  
for Constructing and Comparing Transcriptome-wide  
Gene Regulatory Networks from Single-Cell Data**

**Daniel Osorio, Yan Zhong, Guanxun Li, Jianhua Z. Huang, and James J. Cai**

## Supplementary Data

### Supplementary Tables

**Table S1.** Running time comparison between the gene regulatory network (GRN) construction algorithms.

We compared principal component regression (PCR), Spearman's correlation coefficient (SCC), mutual information (MI), and GENIE3 using 10-times microbenchmark evaluations. PCR implementation is 246 times faster than GENIE3. The test is done on the same workstation, PCR can construct an all-by-all GRN for 15,000 genes in less than 50 minutes, whereas GENIE3 requires more than 24 hours. Abbreviations: EXPR – defines the instruction used in R to perform the network construction; MIN – the minimum; LQ – the 25<sup>th</sup> percentile; MEAN – the average; MEDIAN – the 50<sup>th</sup> percentile; UQ – the 75<sup>th</sup> percentile; MAX – the maximum, time (in seconds) taken to compute the same network across 10 independent evaluations. Note: values are also available at <https://github.com/cailab-tamu/scTenifoldNet/blob/master/inst/benchmarking/results/>

| EXPR                | MIN     | LQ      | MEAN    | MEDIAN  | UQ      | MAX     |
|---------------------|---------|---------|---------|---------|---------|---------|
| PCR(countMatrix)    | 0.820   | 0.847   | 0.929   | 0.887   | 0.985   | 1.233   |
| SCC(countMatrix)    | 0.074   | 0.075   | 0.082   | 0.082   | 0.087   | 0.097   |
| MI(countMatrix)     | 0.016   | 0.017   | 0.020   | 0.019   | 0.024   | 0.026   |
| GENIE3(countMatrix) | 220.670 | 225.088 | 226.736 | 226.714 | 229.138 | 232.545 |

**Table S2.** 56 differentially regulated genes in scTenifoldNet analysis of transcriptional responses of mouse neurons to acute morphine treatment

Identified 56 differentially regulated genes sorted according to the significance level based on the scTenifoldNet differential regulation test. Target genes of the RARB transcription factor (21 out of 56 genes) are highlighted in bold font. The full list (reporting 8,138 genes) is available for downloading at [https://raw.githubusercontent.com/cailab-tamu/scTenifoldNet/master/inst/manuscript/results/sym10X500morphineNeuron\\_Itensor\\_Dalignment.csv](https://raw.githubusercontent.com/cailab-tamu/scTenifoldNet/master/inst/manuscript/results/sym10X500morphineNeuron_Itensor_Dalignment.csv)

| GENE           | DISTANCE    | Z           | FC          | P-VALUE  | FDR         |
|----------------|-------------|-------------|-------------|----------|-------------|
| <b>Ppp3ca</b>  | 0.000505417 | 1.261436871 | 437.1982883 | 4.41E-97 | 3.59E-93    |
| <b>Hpca</b>    | 0.000451657 | 1.252762791 | 349.1376011 | 6.53E-78 | 2.66E-74    |
| <i>Pcp4l1</i>  | 0.000438705 | 1.250518947 | 329.4005652 | 1.30E-73 | 3.52E-70    |
| <i>Rgs7bp</i>  | 0.00037183  | 1.237766693 | 236.6292622 | 2.14E-53 | 4.35E-50    |
| <b>Akap5</b>   | 0.000369005 | 1.23717862  | 233.0464964 | 1.29E-52 | 2.10E-49    |
| <i>Slc24a2</i> | 0.000333128 | 1.229294319 | 189.9326813 | 3.29E-43 | 4.46E-40    |
| <i>Atp2a2</i>  | 0.000326077 | 1.227645545 | 181.9778237 | 1.79E-41 | 2.08E-38    |
| <b>Atp2b1</b>  | 0.000262899 | 1.211050974 | 118.2926978 | 1.50E-27 | 1.52E-24    |
| <b>Ppp1r1b</b> | 0.000237531 | 1.203234585 | 96.56518433 | 8.64E-23 | 7.81E-20    |
| <i>Foxp1</i>   | 0.000235088 | 1.20243811  | 94.58854285 | 2.34E-22 | 1.91E-19    |
| <i>Spock3</i>  | 0.000234686 | 1.20230651  | 94.26586162 | 2.76E-22 | 2.04E-19    |
| <i>Arpp19</i>  | 0.000184148 | 1.183632617 | 58.03775404 | 2.57E-14 | 1.74E-11    |
| <b>Gpr88</b>   | 0.000179385 | 1.181615521 | 55.07460401 | 1.16E-13 | 7.26E-11    |
| <b>Rgs9</b>    | 0.000176012 | 1.180154126 | 53.02265609 | 3.30E-13 | 1.92E-10    |
| <b>Adcy5</b>   | 0.00016515  | 1.175251138 | 46.68025395 | 8.36E-12 | 4.53E-09    |
| <b>Gnal</b>    | 0.00014669  | 1.166129206 | 36.82790684 | 1.29E-09 | 6.56E-07    |
| <i>Ubb</i>     | 0.000144813 | 1.165138306 | 35.89150024 | 2.09E-09 | 9.99E-07    |
| <b>Scn4b</b>   | 0.000141973 | 1.163614607 | 34.4977928  | 4.27E-09 | 1.93E-06    |
| <i>Actb</i>    | 0.000141033 | 1.163103413 | 34.04242857 | 5.39E-09 | 2.31E-06    |
| <b>Calm2</b>   | 0.000140195 | 1.162644572 | 33.63881652 | 6.64E-09 | 2.70E-06    |
| <b>Penk</b>    | 0.000137206 | 1.160986891 | 32.22008587 | 1.38E-08 | 5.33E-06    |
| <i>mt-Rnr1</i> | 0.000132469 | 1.158283381 | 30.03338755 | 4.25E-08 | 1.57E-05    |
| <b>Arpp21</b>  | 0.000130444 | 1.157098489 | 29.12234279 | 6.79E-08 | 2.40E-05    |
| <i>Phactr1</i> | 0.000120406 | 1.150938919 | 24.81276515 | 6.32E-07 | 0.000214225 |
| <i>Cck</i>     | 0.000119607 | 1.150426534 | 24.48437556 | 7.49E-07 | 0.000243863 |
| <b>Eif1</b>    | 0.000117922 | 1.149335785 | 23.7996985  | 1.07E-06 | 0.000334595 |
| <i>mt-Nd1</i>  | 0.000110779 | 1.144529614 | 21.00352911 | 4.58E-06 | 0.001381767 |
| <i>mt-Cytb</i> | 0.000110139 | 1.144083836 | 20.76143989 | 5.20E-06 | 0.001511921 |
| <i>Spred1</i>  | 0.00010886  | 1.143185982 | 20.28227019 | 6.68E-06 | 0.00187502  |
| <i>mt-Nd2</i>  | 0.000107265 | 1.142051021 | 19.69233806 | 9.10E-06 | 0.002467587 |
| <i>mt-Co1</i>  | 0.00010359  | 1.139369985 | 18.36596353 | 1.82E-05 | 0.004785283 |
| <i>Hspa4l</i>  | 0.000101727 | 1.137974627 | 17.71134934 | 2.57E-05 | 0.006385139 |
| <i>Nrn1</i>    | 0.000101688 | 1.137945289 | 17.69783898 | 2.59E-05 | 0.006385139 |
| <b>Scn8a</b>   | 0.000101237 | 1.137603657 | 17.54127063 | 2.81E-05 | 0.006729133 |
| <b>Chn1</b>    | 0.000100641 | 1.13714947  | 17.33525951 | 3.13E-05 | 0.007285116 |
| <i>Diras2</i>  | 9.86E-05    | 1.135567947 | 16.6365887  | 4.53E-05 | 0.010233366 |
| <i>Cpe</i>     | 9.71E-05    | 1.134395301 | 16.13677372 | 5.89E-05 | 0.012961116 |
| <b>Ramp1</b>   | 9.68E-05    | 1.134188236 | 16.05008839 | 6.17E-05 | 0.013211132 |
| <i>B3galt2</i> | 9.58E-05    | 1.133376704 | 15.71481014 | 7.36E-05 | 0.015042375 |
| <b>Chst15</b>  | 9.58E-05    | 1.133358441 | 15.7073458  | 7.39E-05 | 0.015042375 |

|                      |          |             |             |             |             |
|----------------------|----------|-------------|-------------|-------------|-------------|
| <b>Grin2b</b>        | 9.47E-05 | 1.132461883 | 15.34524062 | 8.95E-05    | 0.017773833 |
| <i>Lamp1</i>         | 9.38E-05 | 1.131764442 | 15.06933254 | 0.000103633 | 0.020080194 |
| <b>Rasd2</b>         | 9.36E-05 | 1.131594715 | 15.00294167 | 0.000107344 | 0.020315423 |
| <i>Gabrg1</i>        | 9.28E-05 | 1.130922747 | 14.74294867 | 0.000123207 | 0.022787777 |
| <i>Chst1</i>         | 9.26E-05 | 1.130763107 | 14.68184644 | 0.000127266 | 0.023015378 |
| <i>3110035E14Rik</i> | 9.16E-05 | 1.129872801 | 14.34569311 | 0.000152127 | 0.026913304 |
| <i>Nfia</i>          | 9.13E-05 | 1.129690493 | 14.27781314 | 0.000157713 | 0.027307825 |
| <i>Samd4</i>         | 8.98E-05 | 1.128415938 | 13.81212882 | 0.000202028 | 0.034252132 |
| <i>Sacs</i>          | 8.94E-05 | 1.128012573 | 13.66793622 | 0.000218148 | 0.036230303 |
| <i>Nrxn1</i>         | 8.83E-05 | 1.127134063 | 13.35907405 | 0.000257175 | 0.041857844 |
| <b>D3Bwg0562e</b>    | 8.78E-05 | 1.126626656 | 13.18386957 | 0.000282369 | 0.044568192 |
| <i>Akap9</i>         | 8.77E-05 | 1.126580167 | 13.16793243 | 0.000284781 | 0.044568192 |
| <i>Rtn1</i>          | 8.73E-05 | 1.126226571 | 13.04734237 | 0.000303715 | 0.04663459  |
| <i>Ahsa1</i>         | 8.70E-05 | 1.125961129 | 12.95754223 | 0.000318635 | 0.04717659  |
| <i>D430041D05Rik</i> | 8.70E-05 | 1.12591797  | 12.94299968 | 0.00032112  | 0.04717659  |
| <i>Syn2</i>          | 8.69E-05 | 1.125857388 | 12.92261423 | 0.000324636 | 0.04717659  |

**Table S3.** Summary of enriched functional annotations for 56 differentially regulated genes in scTenifoldNet analysis of transcriptional responses of mouse neurons to acute morphine treatment

Abbreviations: DB = Database reporting the gene set, TERM = Name of the gene set, P-VALUE: P-value result of the hypergeometric test, FDR = Adjusted P-value, ODDS RATIO = Odds ratio computed by the hypergeometric test. GENES = Differentially regulated genes included in the gene set. Full GSEA enrichment is available at [https://raw.githubusercontent.com/cailab-tamu/scTenifoldNet/master/inst/manuscript/results/annotations/A\\_morphineNeurons.csv](https://raw.githubusercontent.com/cailab-tamu/scTenifoldNet/master/inst/manuscript/results/annotations/A_morphineNeurons.csv)

| DB        | TERM                                           | PVALUE   | FDR    | ODDS RATIO | GENES                                                |
|-----------|------------------------------------------------|----------|--------|------------|------------------------------------------------------|
| KEGG      | Parkinson disease                              | 3.03E-06 | 0.0003 | 14.88      | <i>Gnal, Ubb, Nd1, Cytb, Nd2, Adcy5</i>              |
| KEGG      | Dopaminergic synapse                           | 2.08E-06 | 0.0003 | 15.87      | <i>Ppp3ca, Gnal, Ppp1r1b, Grin2b, Calm2, Adcy5</i>   |
| KEGG      | Amphetamine addiction                          | 1.31E-06 | 0.0004 | 26.26      | <i>Ppp3ca, Ppp1r1b, Grin2b, Calm2, Adcy5</i>         |
| BioPlanet | G-protein signaling pathways                   | 2.62E-07 | 0.0004 | 22.56      | <i>Ppp3ca, Gnal, Akap9, Akap5, Calm2, Adcy5</i>      |
| KEGG      | Cocaine addiction                              | 9.78E-06 | 0.0007 | 29.76      | <i>Ppp1r1b, Rgs9, Grin2b, Adcy5</i>                  |
| KEGG      | cAMP signaling pathway                         | 2.69E-05 | 0.0016 | 10.16      | <i>Ppp1r1b, Atp2a2, Atp2b1, Grin2b, Calm2, Adcy5</i> |
| KEGG      | Adrenergic signaling in cardiomyocytes         | 5.85E-05 | 0.0030 | 12.07      | <i>Atp2a2, Atp2b1, Scn4b, Calm2, Adcy5</i>           |
| BioPlanet | Myometrial relaxation and contraction pathways | 4.64E-06 | 0.0035 | 13.82      | <i>Atp2a2, Rgs9, Calm2, Ramp1, Actb, Adcy5</i>       |
| KEGG      | Alzheimer disease                              | 1.29E-04 | 0.0049 | 10.20      | <i>Ppp3ca, Atp2a2, Cytb, Grin2b, Calm2</i>           |
| KEGG      | cGMP-PKG signaling pathway                     | 1.19E-04 | 0.0051 | 10.38      | <i>Ppp3ca, Atp2a2, Atp2b1, Calm2, Adcy5</i>          |
| KEGG      | Calcium signaling pathway                      | 1.85E-04 | 0.0062 | 9.45       | <i>Ppp3ca, Gnal, Atp2a2, Atp2b1, Calm2</i>           |
| KEGG      | Pancreatic secretion                           | 2.14E-04 | 0.0065 | 13.61      | <i>Atp2a2, Cck, Atp2b1, Adcy5</i>                    |
| BioPlanet | Transmission across chemical synapses          | 1.49E-05 | 0.0075 | 11.28      | <i>Gnal, Akap9, Akap5, Syn2, Grin2b, Adcy5</i>       |
| BioPlanet | Nitric oxide signaling pathway                 | 3.08E-05 | 0.0116 | 48.70      | <i>Ppp3ca, Grin2b, Calm2</i>                         |
| KEGG      | Thermogenesis                                  | 4.65E-04 | 0.0128 | 7.73       | <i>Nd1, Cytb, Nd2, Actb, Adcy5</i>                   |
| BioPlanet | Calcium regulation in the cardiac cell         | 6.04E-05 | 0.0182 | 11.98      | <i>Atp2a2, Atp2b1, Rgs9, Calm2, Adcy5</i>            |
| BioPlanet | Opioid signaling                               | 7.44E-05 | 0.0187 | 17.86      | <i>Ppp3ca, Gnal, Ppp1r1b, Adcy5</i>                  |
| KEGG      | Oxytocin signaling pathway                     | 9.10E-04 | 0.0197 | 9.28       | <i>Ppp3ca, Calm2, Actb, Adcy5</i>                    |
| KEGG      | Long-term potentiation                         | 8.77E-04 | 0.0204 | 15.99      | <i>Ppp3ca, Grin2b, Calm2</i>                         |
| KEGG      | Retrograde endocannabinoid signaling           | 8.25E-04 | 0.0208 | 9.52       | <i>Nd1, Nd2, Gabrg1, Adcy5</i>                       |
| BioPlanet | Calcium signaling pathway                      | 1.40E-04 | 0.0234 | 10.03      | <i>Ppp3ca, Gnal, Atp2a2, Atp2b1, Calm2</i>           |
| BioPlanet | Alzheimer's disease                            | 1.09E-04 | 0.0236 | 10.57      | <i>Ppp3ca, Atp2a2, Cytb, Grin2b, Calm2</i>           |
| KEGG      | Gastric acid secretion                         | 1.17E-03 | 0.0237 | 14.48      | <i>Calm2, Actb, Adcy5</i>                            |
| KEGG      | Renin secretion                                | 1.26E-03 | 0.0240 | 14.10      | <i>Ppp3ca, Calm2, Adcy5</i>                          |
| KEGG      | Salivary secretion                             | 1.36E-03 | 0.0243 | 13.74      | <i>Atp2b1, Calm2, Adcy5</i>                          |

|           |                                                                                                                  |          |        |       |                                                |
|-----------|------------------------------------------------------------------------------------------------------------------|----------|--------|-------|------------------------------------------------|
| Reactome  | Neurotransmitter Receptor Binding And Downstream Transmission In The Postsynaptic Cell Homo sapiens R-HSA-112314 | 4.80E-05 | 0.0245 | 12.58 | <i>Gnal, Akap9, Akap5, Grin2b, Adcy5</i>       |
| BioPlanet | Neuronal system                                                                                                  | 1.36E-04 | 0.0258 | 7.57  | <i>Gnal, Akap9, Akap5, Syn2, Grin2b, Adcy5</i> |
| Reactome  | Cardiac conduction Homo sapiens R-HSA-5576891                                                                    | 3.77E-05 | 0.0288 | 13.23 | <i>Scn8a, Akap9, Atp2a2, Atp2b1, Scn4b</i>     |
| Reactome  | Opioid Signalling Homo sapiens R-HSA-111885                                                                      | 7.81E-05 | 0.0299 | 17.64 | <i>Ppp3ca, Gnal, Ppp1r1b, Adcy5</i>            |
| KEGG      | Dilated cardiomyopathy (DCM)                                                                                     | 2.06E-03 | 0.0346 | 11.90 | <i>Atp2a2, Actb, Adcy5</i>                     |
| KEGG      | Alcoholism                                                                                                       | 2.33E-03 | 0.0372 | 7.18  | <i>Ppp1r1b, Grin2b, Calm2, Adcy5</i>           |
| KEGG      | Rap1 signaling pathway                                                                                           | 2.78E-03 | 0.0383 | 6.84  | <i>Grin2b, Calm2, Actb, Adcy5</i>              |
| KEGG      | Aldosterone synthesis and secretion                                                                              | 2.93E-03 | 0.0387 | 10.50 | <i>Atp2b1, Calm2, Adcy5</i>                    |
| KEGG      | Circadian entrainment                                                                                            | 2.70E-03 | 0.0389 | 10.82 | <i>Grin2b, Calm2, Adcy5</i>                    |
| KEGG      | Phototransduction                                                                                                | 2.58E-03 | 0.0391 | 26.46 | <i>Rgs9, Calm2</i>                             |
| Reactome  | Transmission across Chemical Synapses Homo sapiens R-HSA-112315                                                  | 2.69E-05 | 0.0411 | 10.16 | <i>Gnal, Akap9, Akap5, Syn2, Grin2b, Adcy5</i> |
| Reactome  | Muscle contraction Homo sapiens R-HSA-397014                                                                     | 2.19E-04 | 0.0478 | 9.11  | <i>Scn8a, Akap9, Atp2a2, Atp2b1, Scn4b</i>     |

**Table S4.** 125 differentially regulated genes in scTenifoldNet analysis of transcriptional responses of a carcinoma (HNSCC) cell line to cetuximab.

Identified 125 differentially regulated genes sorted according to the significance level based on the scTenifoldNet differential regulation test. Target genes of the *SMAD2* and *SMAD3* transcription factors (39 out of 125 genes) are highlighted in bold font. The full list (reporting 11,140 genes) is available for downloading at [https://raw.githubusercontent.com/cailab-tamu/scTenifoldNet/master/inst/manuscript/results/sym10x500SCC6\\_ttensor\\_Dalignment.csv](https://raw.githubusercontent.com/cailab-tamu/scTenifoldNet/master/inst/manuscript/results/sym10x500SCC6_ttensor_Dalignment.csv)

| GENE                    | DISTANCE    | Z           | FC          | P-VALUE  | FDR         |
|-------------------------|-------------|-------------|-------------|----------|-------------|
| <i>EEF1A1</i>           | 0.000218237 | 1.299249543 | 149.2144722 | 2.57E-34 | 2.87E-30    |
| <i>HMGA1</i>            | 0.000211927 | 1.293259249 | 140.7103801 | 1.86E-32 | 1.04E-28    |
| <i>EEF1D</i>            | 0.000151671 | 1.225774559 | 72.07036265 | 2.08E-17 | 7.22E-14    |
| <i>ACTG1</i>            | 0.00015121  | 1.225168134 | 71.63351925 | 2.59E-17 | 7.22E-14    |
| <i>PHLDA1</i>           | 0.000146704 | 1.219138613 | 67.42708529 | 2.19E-16 | 4.87E-13    |
| <b><i>HBEGF</i></b>     | 0.000128775 | 1.19330152  | 51.95353611 | 5.68E-13 | 1.06E-09    |
| <i>EEF1B2</i>           | 0.000124669 | 1.186913746 | 48.69368397 | 2.99E-12 | 4.76E-09    |
| <b><i>COTL1</i></b>     | 0.000123388 | 1.184879672 | 47.69781626 | 4.97E-12 | 6.92E-09    |
| <b><i>TNFRSF12A</i></b> | 0.000121793 | 1.182320275 | 46.4727078  | 9.29E-12 | 1.15E-08    |
| <i>DDIT3</i>            | 0.000116961 | 1.174369662 | 42.85796136 | 5.89E-11 | 6.56E-08    |
| <b><i>MYC</i></b>       | 0.000115498 | 1.171903518 | 41.79307541 | 1.01E-10 | 1.03E-07    |
| <b><i>FOSL1</i></b>     | 0.000114923 | 1.170925666 | 41.37796006 | 1.25E-10 | 1.16E-07    |
| <b><i>PAWR</i></b>      | 0.000111194 | 1.16447104  | 38.73619062 | 4.85E-10 | 4.16E-07    |
| <i>YBX1</i>             | 0.00010905  | 1.160667676 | 37.25670524 | 1.04E-09 | 8.24E-07    |
| <i>CYTOR</i>            | 0.000108661 | 1.159969197 | 36.99100606 | 1.19E-09 | 8.81E-07    |
| <b><i>EIF4A2</i></b>    | 0.000104968 | 1.15322954  | 34.51963405 | 4.22E-09 | 2.94E-06    |
| <b><i>PTP4A1</i></b>    | 0.000104387 | 1.152148564 | 34.1384092  | 5.13E-09 | 3.36E-06    |
| <i>IER2</i>             | 0.000103444 | 1.150383391 | 33.5246257  | 7.04E-09 | 4.35E-06    |
| <i>MIR4435-2HG</i>      | 0.000102664 | 1.148911568 | 33.02101632 | 9.12E-09 | 5.35E-06    |
| <i>AKAP12</i>           | 0.000101109 | 1.145944397 | 32.02789264 | 1.52E-08 | 8.46E-06    |
| <i>SSFA2</i>            | 9.99E-05    | 1.143584916 | 31.25884091 | 2.26E-08 | 1.20E-05    |
| <b><i>ERRF1</i></b>     | 9.77E-05    | 1.139256559 | 29.89422132 | 4.56E-08 | 2.31E-05    |
| <i>EEF2</i>             | 9.64E-05    | 1.136618233 | 29.09087687 | 6.91E-08 | 3.34E-05    |
| <b><i>ITGA3</i></b>     | 9.28E-05    | 1.129407286 | 27.00026396 | 2.03E-07 | 9.44E-05    |
| <b><i>SLC38A2</i></b>   | 9.15E-05    | 1.126611132 | 26.229334   | 3.03E-07 | 0.000135098 |
| <i>LUC7L3</i>           | 9.08E-05    | 1.125066298 | 25.81258025 | 3.76E-07 | 0.000161199 |
| <i>AHCY</i>             | 9.01E-05    | 1.123678212 | 25.44357981 | 4.56E-07 | 0.00018794  |
| <i>GAPDH</i>            | 8.91E-05    | 1.121519831 | 24.87992038 | 6.10E-07 | 0.000242751 |
| <i>PROSER2</i>          | 8.83E-05    | 1.119773807 | 24.43280055 | 7.69E-07 | 0.000288103 |
| <i>RICTOR</i>           | 8.83E-05    | 1.119711043 | 24.41687352 | 7.76E-07 | 0.000288103 |
| <i>MARCKSL1</i>         | 8.62E-05    | 1.115121377 | 23.27901576 | 1.40E-06 | 0.00050353  |
| <i>DUSP4</i>            | 8.61E-05    | 1.114831586 | 23.20891909 | 1.45E-06 | 0.000505362 |
| <i>MRPL51</i>           | 8.60E-05    | 1.114594811 | 23.15179798 | 1.50E-06 | 0.000505362 |
| <b><i>HDGF</i></b>      | 8.58E-05    | 1.114158241 | 23.04683302 | 1.58E-06 | 0.000518019 |
| <b><i>EREG</i></b>      | 8.56E-05    | 1.113669821 | 22.92994702 | 1.68E-06 | 0.000534764 |
| <b><i>PIM1</i></b>      | 8.49E-05    | 1.112242993 | 22.59176067 | 2.00E-06 | 0.000619947 |
| <i>RND3</i>             | 8.47E-05    | 1.11180148  | 22.48809409 | 2.11E-06 | 0.000636636 |
| <i>PIM3</i>             | 8.42E-05    | 1.110680764 | 22.22701292 | 2.42E-06 | 0.00071015  |
| <b><i>GPRC5A</i></b>    | 8.40E-05    | 1.110121069 | 22.09772663 | 2.59E-06 | 0.000740143 |
| <i>UQCRB</i>            | 8.26E-05    | 1.10703097  | 21.39691779 | 3.73E-06 | 0.001039838 |
| <i>MAFF</i>             | 8.25E-05    | 1.106664534 | 21.31525266 | 3.90E-06 | 0.001046422 |
| <i>FERMT2</i>           | 8.24E-05    | 1.10655672  | 21.29128235 | 3.95E-06 | 0.001046422 |
| <i>SRSF5</i>            | 8.23E-05    | 1.106311856 | 21.23693839 | 4.06E-06 | 0.001051478 |
| <b><i>SH2D3A</i></b>    | 8.20E-05    | 1.105426312 | 21.04152218 | 4.49E-06 | 0.001137346 |
| <i>NDUF55</i>           | 8.19E-05    | 1.105234327 | 20.99938619 | 4.59E-06 | 0.001137346 |

|          |          |             |             |             |             |
|----------|----------|-------------|-------------|-------------|-------------|
| SLC25A5  | 8.14E-05 | 1.104178013 | 20.76900625 | 5.18E-06    | 0.001254819 |
| COX6C    | 8.09E-05 | 1.103024964 | 20.52031865 | 5.90E-06    | 0.001398464 |
| AREG     | 8.08E-05 | 1.102725145 | 20.45612726 | 6.10E-06    | 0.001416031 |
| ASAP1    | 8.07E-05 | 1.102411242 | 20.38912877 | 6.32E-06    | 0.001436554 |
| MIF      | 8.00E-05 | 1.100887201 | 20.06684625 | 7.48E-06    | 0.00166614  |
| C19orf33 | 7.95E-05 | 1.099550799 | 19.78830117 | 8.65E-06    | 0.001889662 |
| CDV3     | 7.85E-05 | 1.097107477 | 19.28867762 | 1.12E-05    | 0.002407327 |
| DDX21    | 7.78E-05 | 1.095418446 | 18.95044968 | 1.34E-05    | 0.002819842 |
| RBX1     | 7.68E-05 | 1.093058232 | 18.48740833 | 1.71E-05    | 0.003528296 |
| AVPI1    | 7.62E-05 | 1.091471589 | 18.18230087 | 2.01E-05    | 0.00406581  |
| POLR2F   | 7.59E-05 | 1.090688683 | 18.0335496  | 2.17E-05    | 0.004317665 |
| KLF3     | 7.45E-05 | 1.087307437 | 17.40452242 | 3.02E-05    | 0.005904323 |
| TMSB4X   | 7.42E-05 | 1.08636165  | 17.23240552 | 3.31E-05    | 0.006271549 |
| FTL      | 7.41E-05 | 1.086317035 | 17.22432717 | 3.32E-05    | 0.006271549 |
| TPM4     | 7.39E-05 | 1.085795708 | 17.13020221 | 3.49E-05    | 0.006380564 |
| NME4     | 7.39E-05 | 1.085784952 | 17.12826542 | 3.49E-05    | 0.006380564 |
| SNRPE    | 7.37E-05 | 1.085240573 | 17.03052012 | 3.68E-05    | 0.006609217 |
| ARHGAP29 | 7.36E-05 | 1.085027905 | 16.99248158 | 3.75E-05    | 0.006635926 |
| PPP1R15A | 7.35E-05 | 1.084669256 | 16.92851808 | 3.88E-05    | 0.006756073 |
| AP1S1    | 7.33E-05 | 1.084198833 | 16.84497333 | 4.06E-05    | 0.006951465 |
| ATP5PF   | 7.28E-05 | 1.082818778 | 16.60217603 | 4.61E-05    | 0.0077702   |
| HSP90AB1 | 7.27E-05 | 1.082670218 | 16.57624212 | 4.67E-05    | 0.0077702   |
| POLR1D   | 7.25E-05 | 1.081922579 | 16.44632114 | 5.00E-05    | 0.00819891  |
| DYNLL1   | 7.18E-05 | 1.080171626 | 16.14589097 | 5.86E-05    | 0.009468299 |
| CNPY2    | 7.14E-05 | 1.079140502 | 15.97145976 | 6.43E-05    | 0.010233625 |
| BACH1    | 7.09E-05 | 1.077843839 | 15.75469363 | 7.21E-05    | 0.011313974 |
| TXNIP    | 7.07E-05 | 1.077382676 | 15.67828803 | 7.51E-05    | 0.011469432 |
| ELL2     | 7.07E-05 | 1.077370851 | 15.67633351 | 7.52E-05    | 0.011469432 |
| VMP1     | 7.03E-05 | 1.076098356 | 15.46738497 | 8.39E-05    | 0.012501241 |
| VDAC1    | 7.03E-05 | 1.076067574 | 15.46236391 | 8.42E-05    | 0.012501241 |
| H3F3A    | 7.01E-05 | 1.07554502  | 15.37736753 | 8.80E-05    | 0.012904293 |
| IMP3     | 6.99E-05 | 1.075101762 | 15.30562332 | 9.14E-05    | 0.013229675 |
| VAMP8    | 6.98E-05 | 1.074795697 | 15.25627379 | 9.39E-05    | 0.013405768 |
| SLC25A6  | 6.96E-05 | 1.074382762 | 15.18993641 | 9.72E-05    | 0.013709273 |
| SNRNP35  | 6.95E-05 | 1.073973106 | 15.12440144 | 0.000100654 | 0.014016046 |
| METRN    | 6.94E-05 | 1.073701024 | 15.0810262  | 0.000102993 | 0.014036374 |
| DYNLT1   | 6.94E-05 | 1.07366349  | 15.07505198 | 0.00010332  | 0.014036374 |
| HSPA5    | 6.92E-05 | 1.073242266 | 15.00816331 | 0.000107047 | 0.014228519 |
| HNRNPA1  | 6.92E-05 | 1.07321542  | 15.00390992 | 0.000107289 | 0.014228519 |
| NDUFB3   | 6.90E-05 | 1.072522623 | 14.89455015 | 0.000113691 | 0.014678557 |
| S100A11  | 6.89E-05 | 1.072461874 | 14.88499765 | 0.000114268 | 0.014678557 |
| ATP5MF   | 6.89E-05 | 1.072423397 | 14.87895036 | 0.000114635 | 0.014678557 |
| NDUFC2   | 6.82E-05 | 1.070515482 | 14.58205147 | 0.000134187 | 0.01683991  |
| STK17A   | 6.82E-05 | 1.070483505 | 14.57712466 | 0.000134538 | 0.01683991  |
| TXN      | 6.77E-05 | 1.068946672 | 14.34222181 | 0.000152408 | 0.018864729 |
| COASY    | 6.75E-05 | 1.06841975  | 14.26252827 | 0.000158999 | 0.01946426  |
| TAF1D    | 6.73E-05 | 1.068024076 | 14.202967   | 0.000164112 | 0.019871767 |
| NDUFA13  | 6.72E-05 | 1.067748235 | 14.16158653 | 0.000167761 | 0.020095213 |
| P4HB     | 6.67E-05 | 1.066104193 | 13.91736244 | 0.000191026 | 0.022373668 |
| PPM1G    | 6.66E-05 | 1.066063663 | 13.91139336 | 0.000191633 | 0.022373668 |
| HSPA1A   | 6.66E-05 | 1.065985677 | 13.89991494 | 0.000192807 | 0.022373668 |
| HERPUD1  | 6.64E-05 | 1.065425113 | 13.81767733 | 0.000201432 | 0.023133541 |
| ATP5MD   | 6.64E-05 | 1.065253644 | 13.79261609 | 0.000204137 | 0.023204956 |
| PFDN4    | 6.63E-05 | 1.065057694 | 13.76403062 | 0.000207267 | 0.023322761 |
| SOX4     | 6.61E-05 | 1.064677602 | 13.70874541 | 0.000213458 | 0.023728819 |
| TRAPPC1  | 6.61E-05 | 1.064576284 | 13.69404473 | 0.000215136 | 0.023728819 |



|                   |          |             |             |             |             |
|-------------------|----------|-------------|-------------|-------------|-------------|
| <i>TRAF4</i>      | 6.60E-05 | 1.064114903 | 13.62729364 | 0.000222921 | 0.024346468 |
| <b>F3</b>         | 6.55E-05 | 1.062923603 | 13.45639198 | 0.000244173 | 0.0264086   |
| <i>WDR83OS</i>    | 6.52E-05 | 1.061825605 | 13.3007118  | 0.000265305 | 0.028418288 |
| <b>HSPE1</b>      | 6.51E-05 | 1.061584641 | 13.2667804  | 0.000270151 | 0.02866171  |
| <i>CCNB1IP1</i>   | 6.49E-05 | 1.061205707 | 13.21359004 | 0.000277926 | 0.029208502 |
| <i>MINOS1</i>     | 6.46E-05 | 1.060283344 | 13.08497981 | 0.000297673 | 0.030834041 |
| <i>OTUD6B-AS1</i> | 6.46E-05 | 1.060226468 | 13.07708893 | 0.00029893  | 0.030834041 |
| <i>ATP5IF1</i>    | 6.44E-05 | 1.059674018 | 13.00068279 | 0.000311377 | 0.031823343 |
| <b>CTNNAL1</b>    | 6.43E-05 | 1.059412837 | 12.96471087 | 0.000317417 | 0.032089877 |
| <b>CLDN1</b>      | 6.43E-05 | 1.059313278 | 12.9510241  | 0.000319747 | 0.032089877 |
| <b>PDCD6</b>      | 6.42E-05 | 1.058921981 | 12.8973664  | 0.000329045 | 0.032728207 |
| <b>FOSL2</b>      | 6.38E-05 | 1.057943703 | 12.76415615 | 0.000353325 | 0.034826429 |
| <b>SEC61B</b>     | 6.38E-05 | 1.057813456 | 12.74652136 | 0.000356672 | 0.034826429 |
| <b>ABL2</b>       | 6.37E-05 | 1.057703501 | 12.73165224 | 0.000359519 | 0.034826429 |
| <i>CITED4</i>     | 6.36E-05 | 1.057119428 | 12.65294985 | 0.000374974 | 0.036010392 |
| <i>SEM1</i>       | 6.34E-05 | 1.056609211 | 12.58458433 | 0.000388942 | 0.036789535 |
| <i>ATP5MPL</i>    | 6.34E-05 | 1.056582262 | 12.58098326 | 0.000389692 | 0.036789535 |
| <i>NEAT1</i>      | 6.33E-05 | 1.056317467 | 12.54565341 | 0.000397129 | 0.037176612 |
| <i>CFL1</i>       | 6.32E-05 | 1.055997784 | 12.50312796 | 0.000406271 | 0.037715513 |
| <i>NDUFS6</i>     | 6.29E-05 | 1.055165051 | 12.39300793 | 0.000430944 | 0.039413981 |
| <b>CLDN4</b>      | 6.29E-05 | 1.055142074 | 12.38998276 | 0.000431643 | 0.039413981 |
| <i>SMIM13</i>     | 6.26E-05 | 1.054415102 | 12.29463831 | 0.000454261 | 0.041142048 |
| <b>LIF</b>        | 6.26E-05 | 1.054160083 | 12.2613602  | 0.000462434 | 0.041544502 |
| <i>DKK1</i>       | 6.23E-05 | 1.053406692 | 12.16355616 | 0.000487324 | 0.043430292 |

**Table S5.** Summary of enriched functional annotations for 125 differentially regulated genes in scTenifoldNet analysis of transcriptional responses of a carcinoma (HNSCC) cell line to cetuximab.

Abbreviations: DB = Database reporting the gene set, TERM = Name of the gene set, P-VALUE: P-value result of the hypergeometric test, FDR = Adjusted P-value, ODDS RATIO = Odds ratio computed by the hypergeometric test. GENES = Differentially regulated genes included in the gene set. Full GSEA enrichment is available at: [https://raw.githubusercontent.com/cailab-tamu/scTenifoldNet/master/inst/manuscript/results/annotations/A\\_SCC.csv](https://raw.githubusercontent.com/cailab-tamu/scTenifoldNet/master/inst/manuscript/results/annotations/A_SCC.csv)

| DB        | TERM                                                                                                                                          | P-VALUE  | FDR      | ODDS RATIO | GENES                                                                                                                                        |
|-----------|-----------------------------------------------------------------------------------------------------------------------------------------------|----------|----------|------------|----------------------------------------------------------------------------------------------------------------------------------------------|
| BioPlanet | EGFR1 pathway                                                                                                                                 | 1.24E-11 | 1.87E-08 | 13.684     | <i>DUSP4, ITGA3, LIF, DDX21, AREG, EREG, CLDN4, MYC, COTL1, TXNIP, LUC7L3, PHLDA1, HBEGF</i>                                                 |
| BioPlanet | Prolactin regulation of apoptosis                                                                                                             | 1.98E-10 | 1.49E-07 | 14.915     | <i>EEF1A1, DUSP4, HSP90AB1, HSPA5, MAFF, CITED4, HNRNPA1, CLDN1, PHLDA1, AREG, RBX1</i>                                                      |
| BioPlanet | T cell receptor regulation of apoptosis                                                                                                       | 6.64E-09 | 3.34E-06 | 5.041      | <i>HSP90AB1, HSPA5, MIF, YBX1, EEF2, DYNLL1, COX6C, HSPE1, MYC, DDIT3, PIM1, VDAC1, SEC61B, SLC25A5, PFDN4, HNRNPA1, GAPDH, IER2, HSPA1A</i> |
| BioPlanet | BDNF signaling pathway                                                                                                                        | 9.87E-09 | 3.73E-06 | 7.969      | <i>DUSP4, HSPA5, DKK1, RND3, HERPUD1, MYC, DDIT3, MAFF, TXNIP, SRSF5, IER2, S100A11, HSPA1A</i>                                              |
| BioPlanet | Parkinson's disease                                                                                                                           | 1.36E-07 | 4.09E-05 | 10.992     | <i>UQCRB, NDUFS6, NDUFS5, NDUFB3, NDUFC2, VDAC1, SLC25A5, COX6C, SLC25A6</i>                                                                 |
| KEGG      | Huntington disease                                                                                                                            | 3.59E-07 | 5.43E-05 | 8.333      | <i>NDUFA13, UQCRB, NDUFS6, NDUFS5, NDUFB3, NDUFC2, POLR2F, VDAC1, SLC25A5, COX6C</i>                                                         |
| BioPlanet | Huntington's disease                                                                                                                          | 2.42E-07 | 6.08E-05 | 8.696      | <i>UQCRB, NDUFS6, NDUFS5, NDUFB3, NDUFC2, POLR2F, VDAC1, SLC25A5, COX6C, SLC25A6</i>                                                         |
| BioPlanet | Electron transport chain                                                                                                                      | 3.12E-07 | 6.73E-05 | 12.190     | <i>UQCRB, NDUFS6, NDUFS5, NDUFB3, NDUFC2, SLC25A5, COX6C, SLC25A6</i>                                                                        |
| KEGG      | Protein processing in endoplasmic reticulum                                                                                                   | 8.67E-07 | 8.76E-05 | 8.834      | <i>PPP1R15A, HSP90AB1, HSPA5, DDIT3, SEC61B, P4HB, RBX1, HERPUD1, HSPA1A</i>                                                                 |
| KEGG      | Parkinson disease                                                                                                                             | 3.04E-07 | 9.23E-05 | 10.000     | <i>NDUFA13, UQCRB, NDUFS6, NDUFS5, NDUFB3, NDUFC2, VDAC1, SLC25A5, COX6C</i>                                                                 |
| BioPlanet | Respiratory electron transport, ATP biosynthesis by chemiosmotic coupling, and heat production by uncoupling proteins                         | 7.45E-07 | 0.000141 | 13.827     | <i>NDUFA13, UQCRB, NDUFS6, NDUFS5, NDUFB3, NDUFC2, COX6C</i>                                                                                 |
| BioPlanet | Protein processing in the endoplasmic reticulum                                                                                               | 1.01E-06 | 0.000169 | 8.675      | <i>PPP1R15A, HSP90AB1, HSPA5, DDIT3, SEC61B, P4HB, RBX1, HERPUD1, HSPA1A</i>                                                                 |
| KEGG      | Non-alcoholic fatty liver disease (NAFLD)                                                                                                     | 4.89E-06 | 0.000370 | 8.477      | <i>NDUFA13, UQCRB, NDUFS6, DDIT3, NDUFS5, NDUFB3, NDUFC2, COX6C</i>                                                                          |
| KEGG      | Alzheimer disease                                                                                                                             | 1.44E-05 | 0.000874 | 7.314      | <i>NDUFA13, UQCRB, NDUFS6, NDUFS5, NDUFB3, NDUFC2, COX6C, GAPDH</i>                                                                          |
| KEGG      | Oxidative phosphorylation                                                                                                                     | 2.14E-05 | 0.001081 | 8.358      | <i>NDUFA13, UQCRB, NDUFS6, NDUFS5, NDUFB3, NDUFC2, COX6C</i>                                                                                 |
| BioPlanet | Tricarboxylic acid (TCA) cycle and respiratory electron transport                                                                             | 8.83E-06 | 0.001333 | 9.573      | <i>NDUFA13, UQCRB, NDUFS6, NDUFS5, NDUFB3, NDUFC2, COX6C</i>                                                                                 |
| Reactome  | Respiratory electron transport Homo sapiens R-HSA-611105                                                                                      | 1.31E-06 | 0.002008 | 12.727     | <i>NDUFA13, UQCRB, NDUFS6, NDUFS5, NDUFB3, NDUFC2, COX6C</i>                                                                                 |
| BioPlanet | Translation factors                                                                                                                           | 1.49E-05 | 0.002043 | 16.000     | <i>EIF4A2, EEF1B2, EEF1A1, EEF1D, EEF2</i>                                                                                                   |
| Reactome  | Respiratory electron transport, ATP synthesis by chemiosmotic coupling, and heat production by uncoupling proteins. Homo sapiens R-HSA-163200 | 5.53E-06 | 0.002820 | 10.275     | <i>NDUFA13, UQCRB, NDUFS6, NDUFS5, NDUFB3, NDUFC2, COX6C</i>                                                                                 |

|           |                                                                                           |          |          |        |                                                                                                                                                                            |
|-----------|-------------------------------------------------------------------------------------------|----------|----------|--------|----------------------------------------------------------------------------------------------------------------------------------------------------------------------------|
| Reactome  | Uptake and function of diphtheria toxin Homo sapiens R-HSA-5336415                        | 4.70E-06 | 0.003597 | 80.000 | <i>HSP90AB1, EEF2, HBEGF</i>                                                                                                                                               |
| KEGG      | Thermogenesis                                                                             | 0.000103 | 0.004479 | 5.541  | <i>NDUFA13, UQCRB, NDUFS6, NDUFS5, NDUFB3, NDUFC2, COX6C, ACTG1</i>                                                                                                        |
| Reactome  | Complex I biogenesis Homo sapiens R-HSA-6799198                                           | 1.35E-05 | 0.005150 | 16.327 | <i>NDUFA13, NDUFS6, NDUFS5, NDUFB3, NDUFC2</i>                                                                                                                             |
| BioPlanet | FSH regulation of apoptosis                                                               | 4.16E-05 | 0.005230 | 5.475  | <i>AKAP12, PTP4A1, GPRC5A, ITGA3, STK17A, PAWR, DKK1, AREG, EREG</i>                                                                                                       |
| KEGG      | ErbB signaling pathway                                                                    | 0.000183 | 0.006935 | 9.524  | <i>MYC, ABL2, AREG, EREG, HBEGF</i>                                                                                                                                        |
| Reactome  | B-WICH complex positively regulates rRNA expression Homo sapiens R-HSA-5250924            | 3.09E-05 | 0.009465 | 13.793 | <i>TAF1D, H3F3A, POLR1D, DDX21, POLR2F</i>                                                                                                                                 |
| BioPlanet | Disease                                                                                   | 8.29E-05 | 0.009629 | 3.323  | <i>HSPA5, H3F3A, HMGA1, RBX1, HERPUD1, MYC, DDIT3, AP1S1, POLR2F, RICTOR, HDGF, SLC25A5, SLC25A6, HSPA1A</i>                                                               |
| BioPlanet | Alzheimer's disease                                                                       | 9.38E-05 | 0.010122 | 6.627  | <i>UQCRB, NDUFS6, NDUFS5, NDUFB3, NDUFC2, COX6C, GAPDH</i>                                                                                                                 |
| Reactome  | The NLRP3 inflammasome Homo sapiens R-HSA-844456                                          | 5.03E-05 | 0.010998 | 40.000 | <i>HSP90AB1, TXNIP, TXN</i>                                                                                                                                                |
| Reactome  | The citric acid (TCA) cycle and respiratory electron transport Homo sapiens R-HSA-1428517 | 5.01E-05 | 0.012780 | 7.320  | <i>NDUFA13, UQCRB, NDUFS6, NDUFS5, NDUFB3, NDUFC2, COX6C</i>                                                                                                               |
| Reactome  | Infectious disease Homo sapiens R-HSA-5663205                                             | 6.75E-05 | 0.012909 | 4.598  | <i>HSP90AB1, HMGA1, AP1S1, POLR2F, EEF2, SLC25A5, RBX1, HBEGF, SLC25A6, HSPA1A</i>                                                                                         |
| BioPlanet | Inflammasomes                                                                             | 0.000152 | 0.015302 | 28.235 | <i>HSP90AB1, TXNIP, TXN</i>                                                                                                                                                |
| BioPlanet | Interactions of HIV Vpr protein with host cellular proteins                               | 0.000163 | 0.015352 | 14.545 | <i>HMGA1, SLC25A5, HSPA1A, SLC25A6</i>                                                                                                                                     |
| Reactome  | Positive epigenetic regulation of rRNA expression Homo sapiens R-HSA-5250913              | 9.41E-05 | 0.015996 | 10.959 | <i>TAF1D, H3F3A, POLR1D, DDX21, POLR2F</i>                                                                                                                                 |
| Reactome  | Cellular responses to stress Homo sapiens R-HSA-2262752                                   | 0.000105 | 0.016019 | 4.360  | <i>EEF1A1, HSP90AB1, HSPA5, H3F3A, HMGA1, TXN, P4HB, DYNLL1, RBX1, HSPA1A</i>                                                                                              |
| Reactome  | Metabolism of proteins Homo sapiens R-HSA-392499                                          | 0.000123 | 0.017128 | 2.682  | <i>EIF4A2, TRAPPC1, HSPA5, H3F3A, TXN, EEF2, DYNLL1, AREG, HERPUD1, EEF1B2, EEF1A1, EEF1D, DDIT3, VDAC1, HDGF, SEC61B, PFDN4, SLC25A6</i>                                  |
| BioPlanet | Myc active pathway                                                                        | 0.000194 | 0.017194 | 9.412  | <i>FOSL1, MYC, PIM1, HMGA1, GAPDH</i>                                                                                                                                      |
| BioPlanet | TGF-beta regulation of extracellular matrix                                               | 0.000223 | 0.017726 | 3.398  | <i>FOSL1, TNFRSF12A, MYC, PIM1, PAWR, CLDN1, DKK1, AREG, F3, CTNNA1, S100A11, HERPUD1</i>                                                                                  |
| BioPlanet | Oxidative phosphorylation                                                                 | 0.000214 | 0.017958 | 7.059  | <i>UQCRB, NDUFS6, NDUFS5, NDUFB3, NDUFC2, COX6C</i>                                                                                                                        |
| Reactome  | Inflammasomes Homo sapiens R-HSA-622312                                                   | 0.000152 | 0.019381 | 28.235 | <i>HSP90AB1, TXNIP, TXN</i>                                                                                                                                                |
| Reactome  | Disease Homo sapiens R-HSA-1643685                                                        | 0.000178 | 0.019424 | 3.090  | <i>HSP90AB1, HMGA1, EEF2, DKK1, EREG, RBX1, MYC, AP1S1, POLR2F, RICTOR, SLC25A5, HBEGF, SLC25A6, HSPA1A</i>                                                                |
| Reactome  | Unfolded Protein Response (UPR) Homo sapiens R-HSA-381119                                 | 0.000205 | 0.020860 | 9.302  | <i>HSPA5, DDIT3, HDGF, SEC61B, HERPUD1</i>                                                                                                                                 |
| Reactome  | Gene Expression Homo sapiens R-HSA-74160                                                  | 0.000178 | 0.020898 | 2.256  | <i>EIF4A2, IMP3, H3F3A, DDX21, TXN, YBX1, EEF2, COX6C, ELL2, EEF1B2, EEF1A1, TAF1D, EEF1D, MYC, POLR1D, POLR2F, SNRPE, RICTOR, SRSF5, SEC61B, SNRNP35, HNRNPA1, HSPA1A</i> |
| BioPlanet | Interleukin-5 regulation of apoptosis                                                     | 0.000291 | 0.022008 | 6.667  | <i>DUSP4, TPM4, PIM1, IER2, FOSL2, HBEGF</i>                                                                                                                               |
| BioPlanet | ERBB signaling pathway                                                                    | 0.000310 | 0.022274 | 8.511  | <i>MYC, ABL2, AREG, EREG, HBEGF</i>                                                                                                                                        |

|           |                                                                   |          |          |        |                                                     |
|-----------|-------------------------------------------------------------------|----------|----------|--------|-----------------------------------------------------|
| BioPlanet | Translation                                                       | 0.000376 | 0.025801 | 6.358  | <i>EIF4A2, EEF1B2, EEF1A1, EEF1D, SEC61B, EEF2</i>  |
| Reactome  | mRNA Splicing Homo sapiens R-HSA-72172                            | 0.000291 | 0.027874 | 6.667  | <i>POLR2F, SNRPE, SRSF5, YBX1, SNRNP35, HNRNPA1</i> |
| Reactome  | mRNA Splicing - Minor Pathway Homo sapiens R-HSA-72165            | 0.000312 | 0.028093 | 12.308 | <i>POLR2F, SNRPE, YBX1, SNRNP35</i>                 |
| BioPlanet | Tumor suppressor Arf inhibits ribosomal biogenesis                | 0.000438 | 0.028770 | 20.000 | <i>MYC, POLR1D, HSPA1A</i>                          |
| Reactome  | Translation Homo sapiens R-HSA-72766                              | 0.000376 | 0.031952 | 6.358  | <i>EIF4A2, EEF1B2, EEF1A1, EEF1D, SEC61B, EEF2</i>  |
| Reactome  | RNA Polymerase I Chain Elongation Homo sapiens R-HSA-73777        | 0.000445 | 0.035803 | 11.228 | <i>TAF1D, H3F3A, POLR1D, POLR2F</i>                 |
| BioPlanet | PERK-regulated gene expression                                    | 0.000696 | 0.043821 | 17.143 | <i>HSPA5, DDIT3, HERPUD1</i>                        |
| Reactome  | Uptake and actions of bacterial toxins Homo sapiens R-HSA-5339562 | 0.000625 | 0.047790 | 17.778 | <i>HSP90AB1, EEF2, HBEGF</i>                        |

**Table S6.** 29 differentially regulated genes in scTenifoldNet analysis of transcriptional responses of human dermal fibroblasts to the double-stranded RNA stimulus.

Identified 29 differentially regulated genes sorted according to the significance level based on the scTenifoldNet differential regulation test. Target genes of the *RELA* transcription factor (14 out of 29 genes) are highlighted in bold font. The full list (containing 7,904 genes) is available for downloading at [https://raw.githubusercontent.com/cailab-tamu/scTenifoldNet/master/inst/manuscript/results/sym10X500DF\\_Itensor\\_Dalignment.csv](https://raw.githubusercontent.com/cailab-tamu/scTenifoldNet/master/inst/manuscript/results/sym10X500DF_Itensor_Dalignment.csv)

| GENE            | DISTANCEZ | FC       | P-VALUE  | FDR       |           |
|-----------------|-----------|----------|----------|-----------|-----------|
| <b>SOD2</b>     | 0.011713  | 2.19348  | 543.7713 | 2.85E-120 | 2.25E-116 |
| <b>GBP1</b>     | 0.011486  | 2.187157 | 522.8897 | 9.95E-116 | 3.93E-112 |
| <i>WARS</i>     | 0.011135  | 2.177163 | 491.4463 | 6.90E-109 | 1.82E-105 |
| <i>ZC3HAV1</i>  | 0.011076  | 2.175438 | 486.2045 | 9.54E-108 | 1.89E-104 |
| <b>EGR1</b>     | 0.010945  | 2.171631 | 474.8289 | 2.85E-105 | 4.51E-102 |
| <b>BBC3</b>     | 0.010762  | 2.166204 | 459.0516 | 7.73E-102 | 1.02E-98  |
| <i>ISG15</i>    | 0.01039   | 2.154919 | 427.8377 | 4.80E-95  | 5.42E-92  |
| <b>HLA-B</b>    | 0.010152  | 2.147514 | 408.474  | 7.88E-91  | 7.78E-88  |
| <i>ZFP36</i>    | 0.009915  | 2.139969 | 389.6078 | 1.01E-86  | 8.85E-84  |
| <b>PPP1R15A</b> | 0.009793  | 2.136045 | 380.1296 | 1.17E-84  | 9.22E-82  |
| <b>JUN</b>      | 0.00973   | 2.133988 | 375.2511 | 1.35E-83  | 9.67E-81  |
| <i>IFI6</i>     | 0.009546  | 2.127923 | 361.209  | 1.54E-80  | 1.01E-77  |
| <b>JUNB</b>     | 0.009401  | 2.123037 | 350.2658 | 3.71E-78  | 2.26E-75  |
| <b>B2M</b>      | 0.009257  | 2.118148 | 339.6356 | 7.66E-76  | 4.32E-73  |
| <i>APOL2</i>    | 0.009111  | 2.113113 | 329.0091 | 1.58E-73  | 8.32E-71  |
| <b>HLA-A</b>    | 0.008515  | 2.091738 | 287.3475 | 1.88E-64  | 9.29E-62  |
| <b>IER3</b>     | 0.007784  | 2.06358  | 240.1286 | 3.69E-54  | 1.71E-51  |
| <i>SAT1</i>     | 0.007619  | 2.056891 | 230.0592 | 5.79E-52  | 2.54E-49  |
| <b>NFKBIA</b>   | 0.00635   | 2.0005   | 159.836  | 1.23E-36  | 5.11E-34  |
| <b>NNMT</b>     | 0.005542  | 1.958886 | 121.7369 | 2.64E-28  | 1.04E-25  |
| <b>FN1</b>      | 0.004237  | 1.87818  | 71.16211 | 3.29E-17  | 1.24E-14  |
| <i>IFITM3</i>   | 0.003611  | 1.830964 | 51.69072 | 6.50E-13  | 2.31E-10  |
| <i>MEG3</i>     | 0.003609  | 1.830771 | 51.62276 | 6.73E-13  | 2.31E-10  |
| <i>NEAT1</i>    | 0.003331  | 1.807323 | 43.97505 | 3.33E-11  | 1.10E-08  |
| <i>COL1A1</i>   | 0.002785  | 1.755558 | 30.74931 | 2.94E-08  | 9.28E-06  |
| <i>PLEKHA4</i>  | 0.002488  | 1.723228 | 24.52613 | 7.33E-07  | 0.000223  |
| <i>EEF1A1</i>   | 0.002222  | 1.69118  | 19.56002 | 9.75E-06  | 0.002854  |
| <i>SOCS1</i>    | 0.002039  | 1.667151 | 16.48527 | 4.90E-05  | 0.01384   |
| <i>SERF2</i>    | 0.001944  | 1.653789 | 14.98184 | 0.000109  | 0.029586  |

**Table S7.** Summary of enriched functional annotations for 29 differentially regulated genes in scTenifoldNet analysis of transcriptional responses of human dermal fibroblasts to the double-stranded RNA stimulus.

Abbreviations: DB = Database reporting the gene set, TERM = Name of the gene set, P-VALUE: P-value result of the hypergeometric test, FDR = Adjusted P-value, ODDS RATIO = Odds ratio computed by the hypergeometric test. GENES = Differentially regulated genes included in the gene set. Full GSEA enrichment is available for downloading at [https://raw.githubusercontent.com/cailab-tamu/scTenifoldNet/master/inst/manuscript/results/annotations/A\\_DF.csv](https://raw.githubusercontent.com/cailab-tamu/scTenifoldNet/master/inst/manuscript/results/annotations/A_DF.csv)

| DB        | TERM                                                                                                 | P-VALUE  | FDR      | ODDS RATIO | GENES                                                                                    |
|-----------|------------------------------------------------------------------------------------------------------|----------|----------|------------|------------------------------------------------------------------------------------------|
| BioPlanet | Interferon signaling                                                                                 | 1.45E-12 | 2.20E-09 | 36.946     | <i>IFITM3, EGR1, SOCS1, IFI6, HLA-B, ISG15, HLA-A, GBP1, B2M</i>                         |
| BioPlanet | Interferon alpha/beta signaling                                                                      | 3.62E-12 | 2.73E-09 | 75.431     | <i>IFITM3, EGR1, SOCS1, IFI6, HLA-B, ISG15, HLA-A</i>                                    |
| Reactome  | Interferon Signaling Homo sapiens R-HSA-913531                                                       | 5.86E-12 | 4.48E-09 | 31.668     | <i>IFITM3, EGR1, SOCS1, IFI6, HLA-B, ISG15, HLA-A, GBP1, B2M</i>                         |
| Reactome  | Interferon alpha/beta signaling Homo sapiens R-HSA-909733                                            | 5.62E-12 | 8.60E-09 | 70.994     | <i>IFITM3, EGR1, SOCS1, IFI6, HLA-B, ISG15, HLA-A</i>                                    |
| BioPlanet | Immune system signaling by interferons, interleukins, prolactin, and growth hormones                 | 1.42E-10 | 7.17E-08 | 22.167     | <i>IFITM3, EGR1, SOCS1, IFI6, HLA-B, ISG15, HLA-A, GBP1, B2M</i>                         |
| BioPlanet | Oncostatin M                                                                                         | 1.01E-08 | 2.54E-06 | 17.740     | <i>COL1A1, JUN, SOCS1, FN1, SOD2, JUNB, B2M, IER3</i>                                    |
| BioPlanet | T cell receptor regulation of apoptosis                                                              | 6.88E-09 | 2.60E-06 | 11.437     | <i>IFITM3, NFKBIA, EGR1, JUN, HLA-B, SOD2, GBP1, JUNB, BBC3, IER3</i>                    |
| BioPlanet | Type II interferon signaling (interferon-gamma)                                                      | 9.02E-09 | 2.72E-06 | 68.966     | <i>SOCS1, IFI6, HLA-B, ISG15, GBP1</i>                                                   |
| Reactome  | Cytokine Signaling in Immune system Homo sapiens R-HSA-1280215                                       | 8.97E-09 | 4.57E-06 | 11.123     | <i>IFITM3, EGR1, SOCS1, IFI6, HLA-B, FN1, ISG15, HLA-A, GBP1, B2M</i>                    |
| BioPlanet | CD8/T cell receptor downstream pathway                                                               | 4.36E-08 | 9.41E-06 | 50.710     | <i>EGR1, JUN, HLA-A, JUNB, B2M</i>                                                       |
| BioPlanet | Immune system                                                                                        | 6.83E-08 | 1.29E-05 | 7.601      | <i>IFITM3, NFKBIA, EGR1, JUN, SOCS1, IFI6, HLA-B, ISG15, HLA-A, GBP1, B2M</i>            |
| Reactome  | Immune System Homo sapiens R-HSA-168256                                                              | 7.06E-08 | 2.70E-05 | 5.795      | <i>IFITM3, EGR1, JUN, IFI6, HLA-B, FN1, ISG15, HLA-A, NFKBIA, SOCS1, GBP1, B2M, IER3</i> |
| BioPlanet | Endosomal/vacuolar pathway                                                                           | 2.29E-07 | 3.84E-05 | 229.885    | <i>HLA-B, HLA-A, B2M</i>                                                                 |
| BioPlanet | Interferon-gamma signaling pathway                                                                   | 2.62E-07 | 3.95E-05 | 35.549     | <i>SOCS1, HLA-B, HLA-A, GBP1, B2M</i>                                                    |
| Reactome  | Interferon gamma signaling Homo sapiens R-HSA-877300                                                 | 2.12E-07 | 6.49E-05 | 37.078     | <i>SOCS1, HLA-B, HLA-A, GBP1, B2M</i>                                                    |
| BioPlanet | Interleukin-1 regulation of extracellular matrix                                                     | 7.57E-07 | 0.000104 | 28.736     | <i>NFKBIA, ZFP36, JUN, HLA-B, SOD2</i>                                                   |
| Reactome  | Endosomal/Vacuolar pathway Homo sapiens R-HSA-1236977                                                | 5.98E-07 | 0.000152 | 172.414    | <i>HLA-B, HLA-A, B2M</i>                                                                 |
| BioPlanet | AP-1 transcription factor network                                                                    | 3.06E-06 | 0.000385 | 39.409     | <i>EGR1, JUN, HLA-A, JUNB</i>                                                            |
| Reactome  | Antigen Presentation: Folding, assembly and peptide loading of class I MHC Homo sapiens R-HSA-983170 | 6.17E-06 | 0.001349 | 82.759     | <i>HLA-B, HLA-A, B2M</i>                                                                 |
| BioPlanet | Interleukin-2 signaling pathway                                                                      | 1.94E-05 | 0.002257 | 6.514      | <i>IFITM3, ZFP36, JUN, SOCS1, WARS, GBP1, BBC3, IER3</i>                                 |
| Reactome  | Innate Immune System Homo sapiens R-HSA-168249                                                       | 1.37E-05 | 0.002619 | 6.837      | <i>NFKBIA, JUN, SOCS1, HLA-B, FN1, ISG15, B2M, IER3</i>                                  |
| BioPlanet | Prolactin regulation of apoptosis                                                                    | 2.44E-05 | 0.002631 | 23.378     | <i>EEF1A1, EGR1, GBP1, IER3</i>                                                          |
| KEGG      | Osteoclast differentiation                                                                           | 3.36E-05 | 0.003392 | 21.552     | <i>NFKBIA, JUN, SOCS1, JUNB</i>                                                          |

|           |                                                                                                      |          |          |         |                                      |
|-----------|------------------------------------------------------------------------------------------------------|----------|----------|---------|--------------------------------------|
| KEGG      | Human T-cell leukemia virus 1 infection                                                              | 2.47E-05 | 0.003746 | 14.075  | <i>NFKBIA, EGR1, ZFP36, JUN, B2M</i> |
| KEGG      | AGE-RAGE signaling pathway in diabetic complications                                                 | 1.32E-05 | 0.004001 | 27.313  | <i>COL1A1, EGR1, JUN, FN1</i>        |
| BioPlanet | Regulation of NFAT transcription factors                                                             | 4.26E-05 | 0.004286 | 44.021  | <i>EGR1, JUN, JUNB</i>               |
| BioPlanet | Interleukin-5 regulation of apoptosis                                                                | 5.32E-05 | 0.005022 | 19.157  | <i>EGR1, SOCS1, SOD2, IER3</i>       |
| BioPlanet | Nef-mediated downregulation of MHC class I complex cell surface expression                           | 9.07E-05 | 0.008056 | 137.931 | <i>HLA-A, B2M</i>                    |
| BioPlanet | Interleukin-12-mediated signaling events                                                             | 0.000113 | 0.008956 | 31.830  | <i>SOCS1, HLA-A, B2M</i>             |
| BioPlanet | Erythropoietin-mediated neuroprotection through NF-kB                                                | 0.000111 | 0.009291 | 125.392 | <i>NFKBIA, SOD2</i>                  |
| BioPlanet | CTL mediated immune response against target cells                                                    | 0.000157 | 0.011837 | 106.101 | <i>HLA-A, B2M</i>                    |
| BioPlanet | Prolactin activation of MAPK signaling                                                               | 0.000173 | 0.012406 | 27.586  | <i>NFKBIA, JUN, SOCS1</i>            |
| BioPlanet | Antigen processing and presentation                                                                  | 0.000217 | 0.013636 | 25.543  | <i>HLA-B, HLA-A, B2M</i>             |
| BioPlanet | Apoptosis modulation and signaling                                                                   | 0.000209 | 0.013715 | 25.862  | <i>NFKBIA, JUN, BBC3</i>             |
| BioPlanet | Antigen processing: cross presentation                                                               | 0.000201 | 0.013814 | 26.189  | <i>HLA-B, HLA-A, B2M</i>             |
| Reactome  | Nef mediated downregulation of MHC class I complex cell surface expression Homo sapiens R-HSA-164940 | 0.000091 | 0.015418 | 137.931 | <i>HLA-A, B2M</i>                    |
| BioPlanet | Cadmium-induced DNA biosynthesis and proliferation in macrophages                                    | 0.000272 | 0.016452 | 81.136  | <i>NFKBIA, JUN</i>                   |
| Reactome  | ER-Phagosome pathway Homo sapiens R-HSA-1236974                                                      | 0.000113 | 0.017243 | 31.830  | <i>HLA-B, HLA-A, B2M</i>             |
| BioPlanet | Senescence and autophagy                                                                             | 0.000392 | 0.021113 | 20.899  | <i>COL1A1, JUN, FN1</i>              |
| BioPlanet | 4-1BB-dependent immune response                                                                      | 0.000380 | 0.021224 | 68.966  | <i>NFKBIA, JUN</i>                   |
| BioPlanet | TSH regulation of gene expression                                                                    | 0.000369 | 0.021415 | 21.330  | <i>PPP1R15A, EGR1, JUN</i>           |
| BioPlanet | ERBB1 downstream pathway                                                                             | 0.000478 | 0.023296 | 19.519  | <i>EGR1, ZFP36, JUN</i>              |
| BioPlanet | Interleukin-4 signaling pathway                                                                      | 0.000452 | 0.023553 | 19.894  | <i>NFKBIA, COL1A1, SOCS1</i>         |
| BioPlanet | Antigen presentation: folding, assembly, and peptide loading of class I MHC proteins                 | 0.000477 | 0.024008 | 10.818  | <i>SOCS1, HLA-B, HLA-A, B2M</i>      |
| KEGG      | Epstein-Barr virus infection                                                                         | 0.000318 | 0.024054 | 12.046  | <i>NFKBIA, JUN, ISG15, B2M</i>       |
| BioPlanet | Ras-independent pathway in NK cell-mediated cytotoxicity                                             | 0.000549 | 0.024396 | 57.471  | <i>HLA-A, B2M</i>                    |
| BioPlanet | Interleukin-4 regulation of apoptosis                                                                | 0.000567 | 0.024465 | 10.332  | <i>JUN, NNMT, IFI6, FN1</i>          |
| BioPlanet | FSH regulation of apoptosis                                                                          | 0.000536 | 0.024517 | 10.489  | <i>IFITM3, ISG15, GBP1, IER3</i>     |
| BioPlanet | BDNF signaling pathway                                                                               | 0.000521 | 0.024568 | 10.569  | <i>EGR1, ZFP36, JUN, JUNB</i>        |
| BioPlanet | Alpha-9 beta-1 integrin pathway                                                                      | 0.000597 | 0.025022 | 55.172  | <i>FN1, SAT1</i>                     |
| BioPlanet | Oxidative stress                                                                                     | 0.000697 | 0.026975 | 51.086  | <i>SOD2, JUNB</i>                    |
| BioPlanet | Immunoregulatory interactions between a lymphoid and a non-lymphoid cell                             | 0.000670 | 0.027356 | 17.386  | <i>HLA-B, HLA-A, B2M</i>             |
| BioPlanet | TNF/stress-related signaling                                                                         | 0.000697 | 0.027685 | 51.086  | <i>NFKBIA, JUN</i>                   |
| BioPlanet | Nef in HIV-1 replication and disease pathogenesis                                                    | 0.000750 | 0.028298 | 49.261  | <i>HLA-A, B2M</i>                    |
| BioPlanet | Interleukin-1 signaling pathway                                                                      | 0.000773 | 0.028481 | 16.552  | <i>NFKBIA, ZFP36, JUN</i>            |
| BioPlanet | T cell receptor calcium pathway                                                                      | 0.000804 | 0.028921 | 47.562  | <i>JUN, JUNB</i>                     |
| BioPlanet | Tumor necrosis factor (TNF) pathway                                                                  | 0.000861 | 0.029552 | 45.977  | <i>NFKBIA, JUN</i>                   |

|           |                                                                                                                                    |          |          |        |                                         |
|-----------|------------------------------------------------------------------------------------------------------------------------------------|----------|----------|--------|-----------------------------------------|
| BioPlanet | CD40/CD40L signaling                                                                                                               | 0.000920 | 0.030189 | 44.494 | <i>NFKBIA, JUN</i>                      |
| BioPlanet | Inflammatory response pathway                                                                                                      | 0.000861 | 0.030239 | 45.977 | <i>COL1A1, FN1</i>                      |
| BioPlanet | Alpha-V beta-3 integrin/OPN pathway                                                                                                | 0.000920 | 0.030860 | 44.494 | <i>NFKBIA, JUN</i>                      |
| Reactome  | Antigen processing-Cross presentation<br>Homo sapiens R-HSA-1236975                                                                | 0.000225 | 0.031259 | 25.231 | <i>HLA-B, HLA-A, B2M</i>                |
| Reactome  | Toll Like Receptor 2 (TLR2) Cascade<br>Homo sapiens R-HSA-181438                                                                   | 0.000316 | 0.032191 | 22.489 | <i>NFKBIA, JUN, SOCS1</i>               |
| KEGG      | TNF signaling pathway                                                                                                              | 0.000533 | 0.032298 | 18.809 | <i>NFKBIA, JUN, JUNB</i>                |
| BioPlanet | Toll-like receptor signaling pathway<br>regulation                                                                                 | 0.001118 | 0.034464 | 14.570 | <i>NFKBIA, JUN, SOCS1</i>               |
| Reactome  | Toll Like Receptor TLR6:TLR2 Cascade<br>Homo sapiens R-HSA-168188                                                                  | 0.000316 | 0.034490 | 22.489 | <i>NFKBIA, JUN, SOCS1</i>               |
| BioPlanet | EPO receptor signaling                                                                                                             | 0.001107 | 0.034810 | 40.568 | <i>JUN, SOCS1</i>                       |
| BioPlanet | EGF receptor transactivation by GPCRs<br>in cardiac hypertrophy                                                                    | 0.001107 | 0.035551 | 40.568 | <i>NFKBIA, JUN</i>                      |
| Reactome  | Toll Like Receptor TLR1:TLR2 Cascade<br>Homo sapiens R-HSA-168179                                                                  | 0.000316 | 0.037143 | 22.489 | <i>NFKBIA, JUN, SOCS1</i>               |
| BioPlanet | FRA pathway                                                                                                                        | 0.001310 | 0.038790 | 37.279 | <i>JUN, JUNB</i>                        |
| BioPlanet | Allograft rejection                                                                                                                | 0.001310 | 0.039566 | 37.279 | <i>HLA-B, HLA-A</i>                     |
| Reactome  | Nef-mediates down modulation of cell<br>surface receptors by recruiting them to<br>clathrin adapters Homo sapiens R-HSA-<br>164938 | 0.000419 | 0.040075 | 65.681 | <i>HLA-A, B2M</i>                       |
| BioPlanet | Signal transduction through IL-1R                                                                                                  | 0.001382 | 0.040121 | 36.298 | <i>NFKBIA, JUN</i>                      |
| Reactome  | MyD88:Mal cascade initiated on plasma<br>membrane Homo sapiens R-HSA-<br>166058                                                    | 0.000316 | 0.040239 | 22.489 | <i>NFKBIA, JUN, SOCS1</i>               |
| KEGG      | Measles                                                                                                                            | 0.001164 | 0.044100 | 14.368 | <i>NFKBIA, JUN, BBC3</i>                |
| KEGG      | Relaxin signaling pathway                                                                                                          | 0.000886 | 0.044739 | 15.794 | <i>NFKBIA, COL1A1, JUN</i>              |
| BioPlanet | Adaptive immune system                                                                                                             | 0.001632 | 0.045634 | 5.690  | <i>NFKBIA, SOCS1, HLA-B, HLA-A, B2M</i> |
| BioPlanet | Graft-versus-host disease                                                                                                          | 0.001607 | 0.045792 | 33.642 | <i>HLA-B, HLA-A</i>                     |
| BioPlanet | TWEAK signaling pathway                                                                                                            | 0.001686 | 0.046292 | 32.841 | <i>NFKBIA, JUN</i>                      |
| BioPlanet | Type 1 diabetes mellitus                                                                                                           | 0.001767 | 0.046805 | 32.077 | <i>HLA-B, HLA-A</i>                     |
| KEGG      | Apoptosis                                                                                                                          | 0.001096 | 0.047432 | 14.674 | <i>NFKBIA, JUN, BBC3</i>                |
| BioPlanet | Beta-3 integrin cell surface interactions                                                                                          | 0.001767 | 0.047640 | 32.077 | <i>COL1A1, FN1</i>                      |
| BioPlanet | Gastrin pathway                                                                                                                    | 0.001849 | 0.048145 | 31.348 | <i>JUN, IER3</i>                        |



## Supplementary Figures

**Figure S1.** Benchmarking of scTenifoldNet/PC-regression and 11 other existing methods for single-cell gene regulatory network construction using BEELINE.

Performance of 12 methods for single-cell gene regulatory network construction evaluated using BEELINE and the same curated synthetic dataset. Methods are ranked by average performance among three different metrics: the precision-recall curve (AUPRC), the receiver operating characteristic curve (AUROC), and the time of computing. Briefly, we used the GSD dataset included in the BEELINE package and added our scTenifoldNet/PC regression to the list of other available methods (PIDC, PPCOR, LEAP, GRNBOOST2, GENIE3, SCINGE, SINCERITIES, GRISLI, SCODE, GRNVBEM, and SCNS) included in their pipeline to compare the performance for the network construction. We compared the results obtained (see the figure below) and ranked the methods based on their average performance. scTenifoldNet performed better than almost all other existing methods on this test data set. Note that GSD is the largest curated reference data set (in terms of the number of genes and number of cells included) in the BEELINE package.

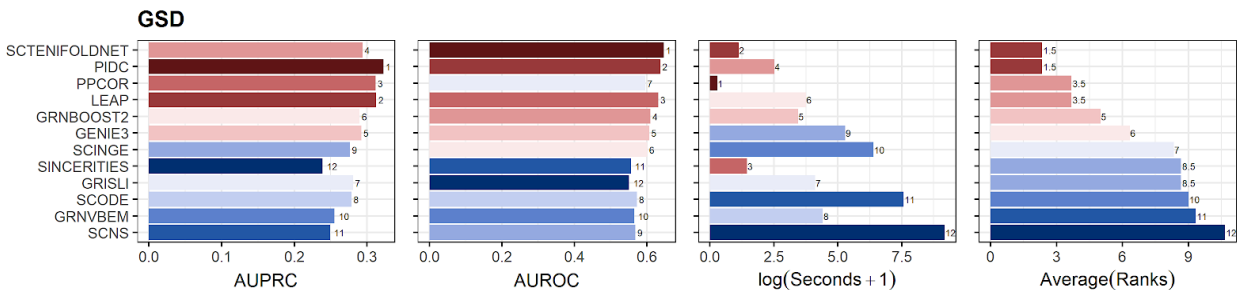

**Figure S2.** Influence of input data normalization on network construction.

Snapshots (showing 500 x 500 adjacency matrices) of the constructed networks using the same input (real data set 1: mock-treated mouse neurons) subjected to normalizations using the library size-based and DESeq methods.

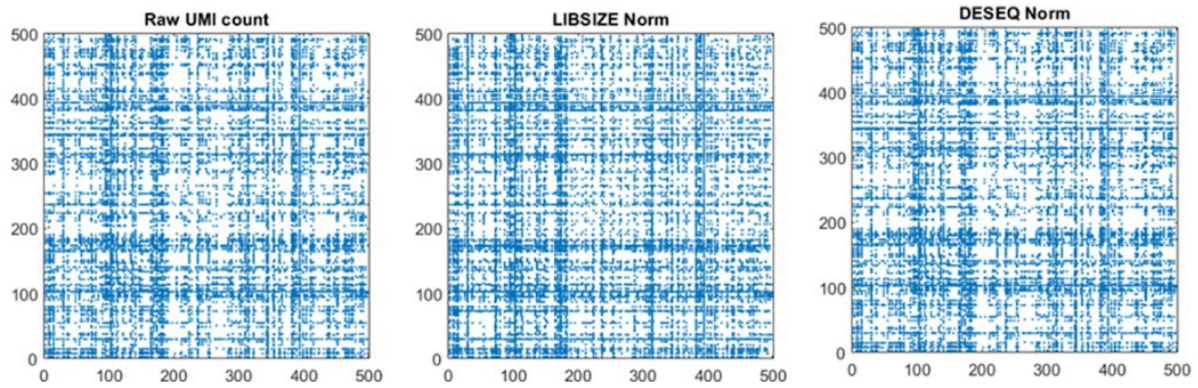

**Figure S3.** Influence of input data imputation on network construction.

Snapshot (showing 500 x 500 adjacency matrices) of the constructed networks using the same input (real data set 1: mock-treated mouse neurons) before and after the expression matrix imputation using MAGIC.

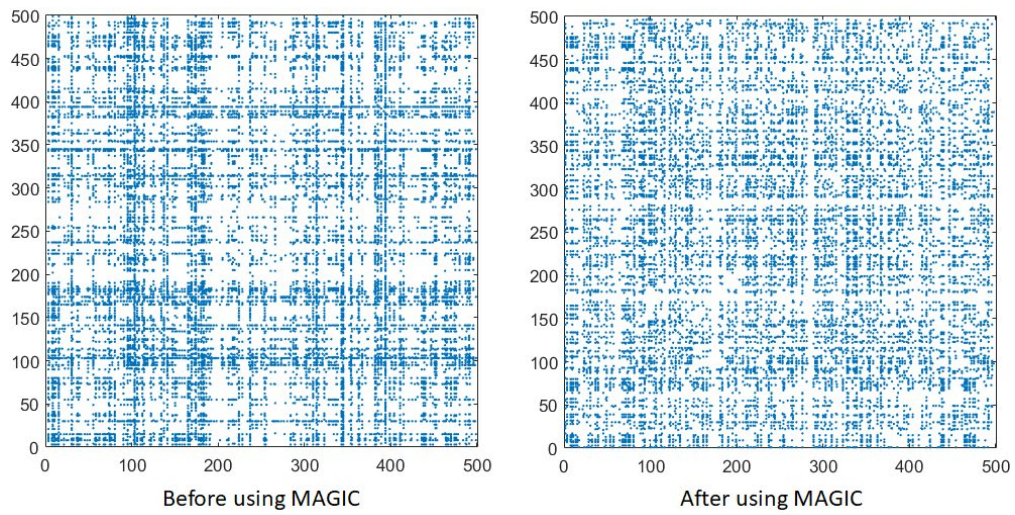

**Figure S4.** Sensibility of scTenifoldNet to different sample sizes used as input.

Comparison of the ranked list (Z-score of the computed distance used as the metric) returned by scTenifoldNet using different combinations of balanced and unbalanced sample sizes as input. Cells were subsampled from the mouse neurons dataset to generate different input sizes for scTenifoldNet under the parameters by default. In the left panel, results are presented as a heatmap of the ranked lists and labels of the genes associated with morphine addiction in the KEGG database. At the top of the right panel, the principal component analysis of the ranked lists. In the middle of the left panel, the Spearman coefficient correlation (SCC) between ranked lists, and at the bottom of the right panel is the number of tested genes in the function of the sample size used as input in the balanced scenarios.

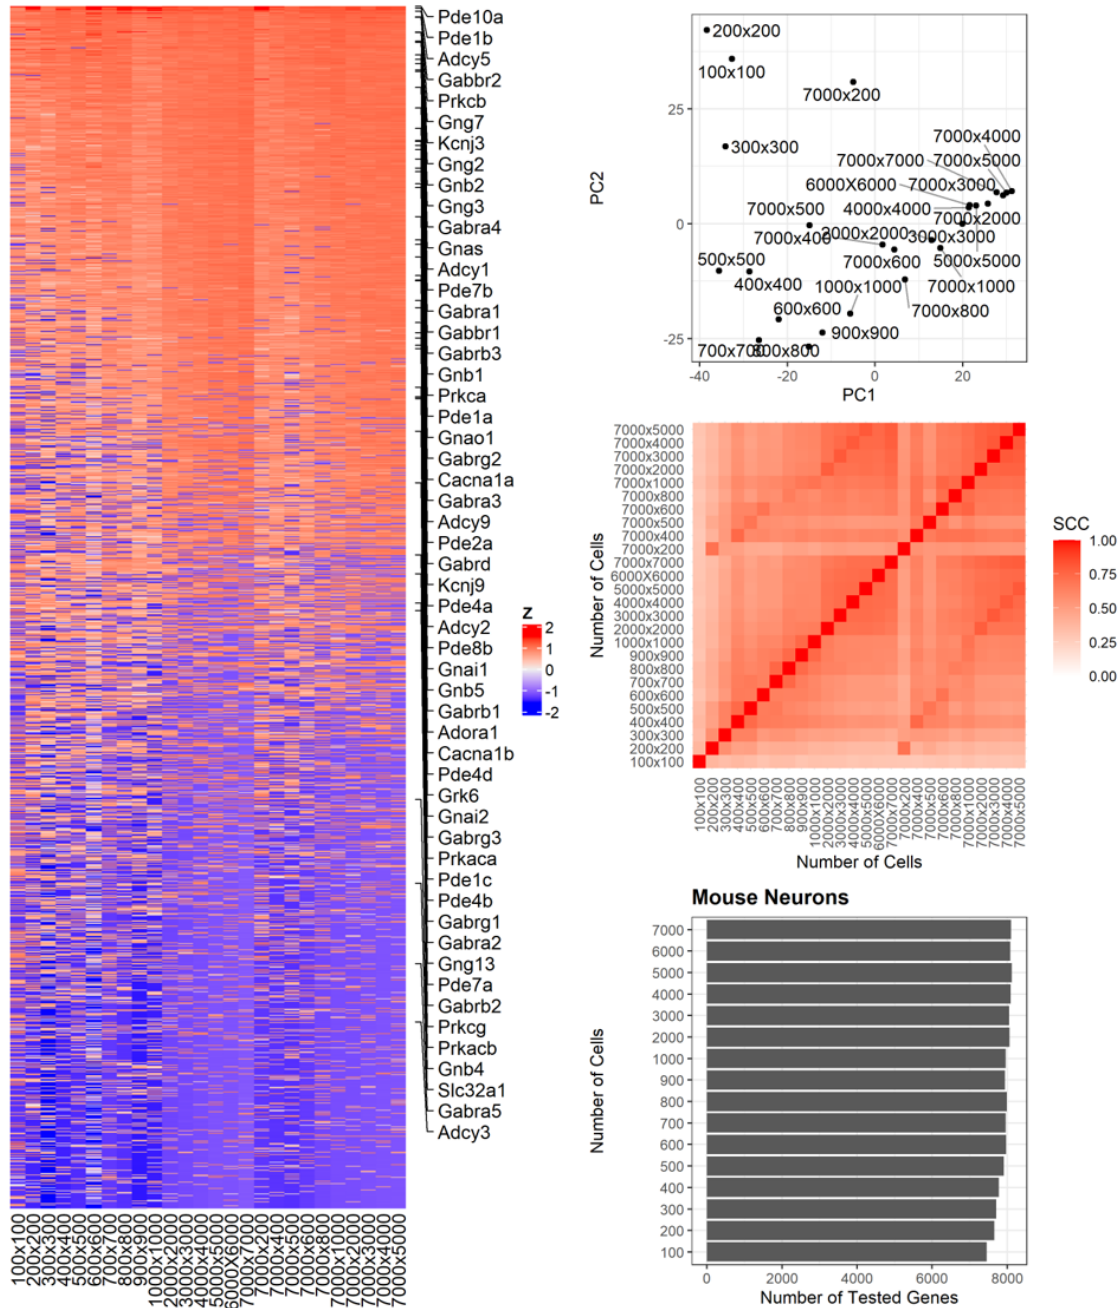

**Figure S5.** Relationship between node degree and average gene expression level across the output of scTenifoldNet/PC-regression and 11 other existing methods for single-cell gene regulatory network construction.

Comparison of the relationship between the node degree and gene expression values across the output of 11 methods included in the BEELINE pipeline and scTenifoldNet/PC-regression using the same dataset as input. For each package, using the GSD data set included in the BEELINE package, we generated a single-cell gene regulatory network and computed the degree for each gene. The calculated degree was then correlated (using Spearman's correlation coefficient) with the average gene expression level calculated from the input expression matrix. Left panel shows that, among all the tested methods, scTenifoldNet displays the smallest absolute correlation. Right panel shows the mean correlation values and their associated standard deviations after ten tests as a function of the number of cells in resampled matrices.

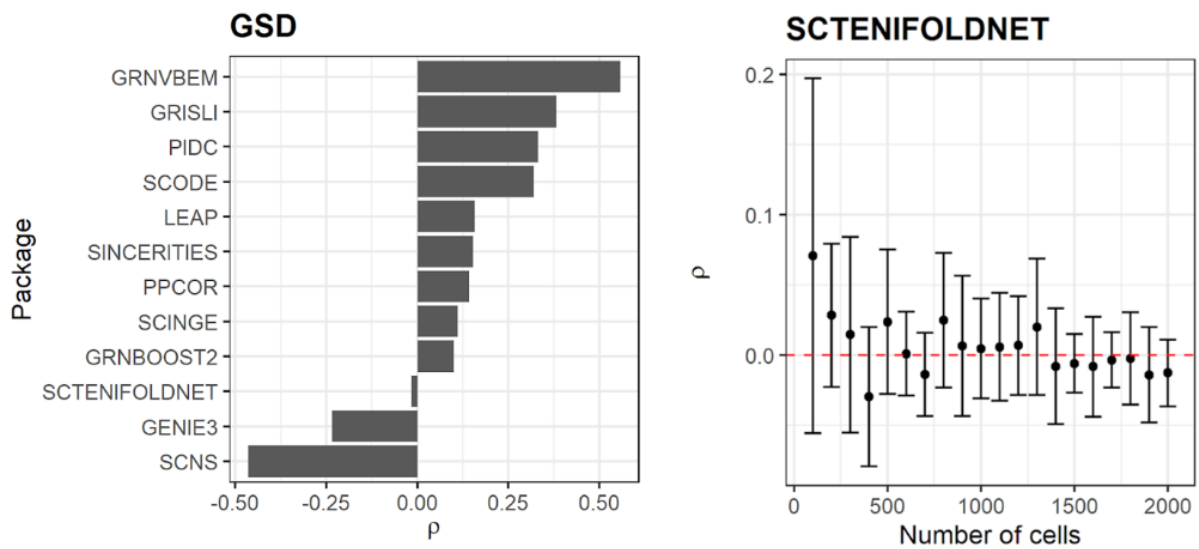

Supplement: mmc1.pdf [file mmc1.pdf]
